# Supplementary material
Source: publisher figshare collection journal article supplement (https://frontiersin.figshare.com/ndownloader/files/15743453)
Supplement: Supplementary file [file 15743453]

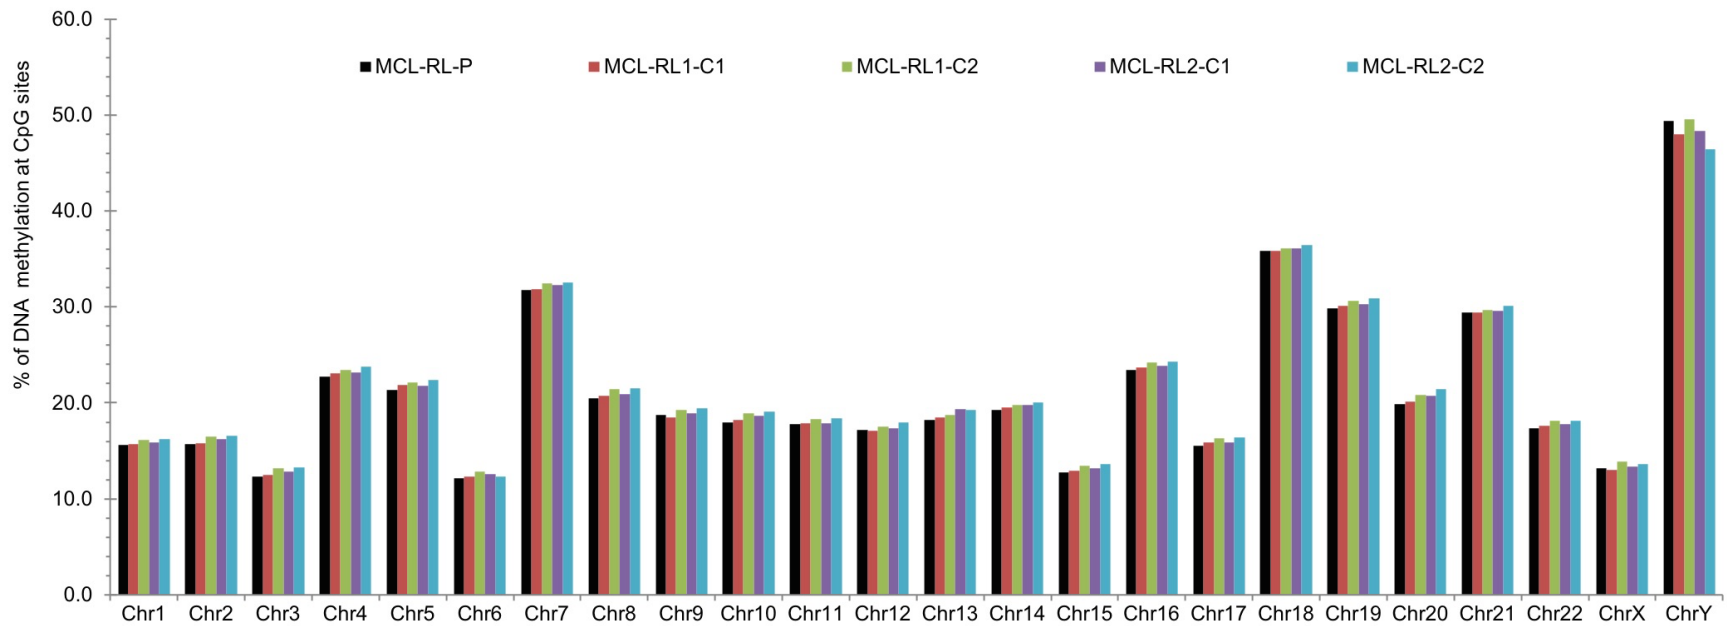

**Supplemental Figure 3. DNA methylation pattern in primary and cultured MCL cells.** Comparative analysis of whole genome DNA methylation in primary cells and primary cell-derived cultured MCL-RL cells. The results show methylation degree of all 23 chromosome pairs in the primary cells (MCL-RL--P), first sub-cell line maintained for 3 months (MCL-RL1-C1) and 6 months (MCL-RL1-C2) since initiation of fresh primary cells culture, and second sub-cell line also maintained for 3 months (MCL-RL2-C1) and 6 months (MCL-RL2-C2).
